# Supplementary material for: Engineering combinatorial and dynamic decoders using synthetic immediate-early genes
Source: PubMed Central journal article supplement (PMC7426417; doi:10.1038/s42003-020-01171-1), 2020-08-13
Supplement: 42003_2020_1171_MOESM2_ESM.pdf [file 42003_2020_1171_MOESM2_ESM.pdf]

## Description of Additional Supplementary Files

**File Name: Supplementary Movie 1**

**Description:** Time-lapse imaging of NIH 3T3 containing fos-btg2 SynIEG in the MCP mCherry channel to visualize transcriptional induction. MCP-mCherry images were collected at 0.7  $\mu\text{m}$  z-stacks and the processed using maximum intensity projection. Cells were stimulated with serum and images were acquired every 3 minutes

**File Name: Supplementary Data 1**

**Description:** Raw data for all experiments

**File Name: Supplementary Data 2**

**Description:** MATLAB scripts to analyze bursts. Included are the analysis script as well as test data sets to recapitulate figures from the paper

**File Name: Supplementary Data 3**

**Description:** R scripts to analyze protein fluorescence. Included are the analysis script and test data sets
